# Supplementary material
Source: ML conference proceedings conference paper supplement (https://openaccess.thecvf.com/content/ICCV2025/html/Fan_Scaling_Language-Free_Visual_ICCV_2025_paper.html)
Supplement: Supplementary file 1 [file Fan_Scaling_Language-Free_Visual_ICCV_2025_supplemental.pdf]

## A. Implementation Details

**Training.** For training Web-DINO, Web-MAE, and CLIP models, we closely follow the existing open-source codebases: the official DINOv2 and MAE repositories, and the MetaCLIP codebase which builds on top of the OpenCLIP codebase [21]. We use Fully Sharded Data Parallel (FSDP) [110] for distributed training of larger models.

For Web-DINO and CLIP pretraining, we follow the exact recipe and hyperparameters from the original paper for their largest model. For MAE pretraining, we observe that training becomes more prone to divergence as model size increases. To mitigate this, we reduce the learning rate from  $2.4\text{e-}3$  to  $1.6\text{e-}3$  and extend the warmup period to 80K iterations. Table 3 provides a summary of the pretraining hyperparameters for training on 2B samples.

| Model    | Batch Size | Learning Rate   | Warmup |
|----------|------------|-----------------|--------|
| Web-DINO | 3072       | $3.5\text{e-}4$ | 100K   |
| Web-MAE  | 4096       | $1.6\text{e-}3$ | 80K    |
| CLIP     | 32768      | $4\text{e-}4$   | 2K     |

Table 3. Hyperparameters for Web-DINO, Web-MAE and CLIP.

**VQA evaluation.** For VQA evaluation, we follow Tong et al. [91, 92] and use Cambrian-Alignment data for MLP projector training and Cambrian-7M for MLP and LLM fine-tuning. We finetune on top of Llama-3 8B Instruct [2]. The vision encoder is frozen throughout finetuning. We excluded LAION [77] images from the Cambrian data to comply with safety standards. We first encode the images at the model’s original input resolution using the pretrained vision encoder. Next, we extract features from the final encoder layer. Following prior approaches [91, 92], we then resize the resulting token sequence to a fixed length of 576 tokens through bilinear interpolation. This ensures consistency across evaluations despite variations in input image resolutions. We report configurations in Tab. 4.

**Classic vision evaluation.** We follow the evaluation procedure in DINOv2 [73] for all classic vision evaluation: linear probe on ImageNet1k [24], ADE20K [111], and NYU Depth v2 [79]. For ImageNet-1k, we evaluate models with their pretrained image resolution; For ADE20K and NYU Depth v2, we use the settings from Oquab et al. [73]. For ADE20K, we follow DINOv2 and report the **linear** and **+ms** setting. For NYU Depth v2, we report **lin.** 1 and **lin.** 4. See the original paper for additional details.

**Model architectures.** To recap, we first borrowed the ViT-g architecture from Oquab et al. [73] and named it ViT-1B for consistent notation. We then define 2B, 3B, 5B, and 7B architectures inspired by language model scaling.

Specifically, the 2 - 7B architectures are wider than the 1B variant, inspired by language model recipes. Our 7B architecture is almost identical to the Llama-2 7B design, except for the patch embedding layer which is unique to ViTs. See Table 5.

**Text filtering.** In Question 4, we introduced the “Light” and “Heavy” filters which retain 50.3% and 1.3% of MC-2B respectively. Specifically, we use a small MLLM, SmolVLM2 [3], to identify images containing text, using prompts such as “Does this image contain any readable text?”. The intention is not to achieve perfect filtering, but rather to skew the data distribution in the general desired direction. See Fig. 8 for a visualization of the filtering process and some examples. This results in two curated datasets:

(i) Light filter: Retains 50.3% of the original data, primarily consisting of images with some textual content. Prompt used: “Does this image contain any readable text? Answer only yes or no.”

(ii) Heavy filter: Retains only 1.3% of the data, focusing mainly on charts and documents. Prompt used: “Please think carefully before answering. Does this image contain charts, tables, or documents with readable text? Answer only yes or no.”

## B. Full Results

We include full results of all experiments presented in Sec. 3 and Sec. 4.

### B.1. Web-DINO

**Scaling up model sizes.** We show quantitative results of scaling up the model under VQA evaluation in Tab. 6 and classic vision evaluation in Tab. 7. These are the numerical results for Sec. 3.1.

**Scaling up data sizes.** We show quantitative results of scaling up the number of data seen with Web-DINO ViT-7B on VQA evaluation in Tab. 8 and classic vision evaluation in Tab. 9. These are the numerical results for Sec. 3.2.

**Scaling down training data.** We show VQA evaluation results from training Web-DINO on less diverse data—ImageNet-1k, in Tab. 10. These are the full results for scaling down training data experiments in Question 2.

### B.2. Web-MAE

We show VQA evaluation results from scaling up MAE trained on MC-2B, in Tab. 11. These are the full results for Question 1.

| Backbone<br>LLM     | Data                  |                    | Adapter |     |     | Instruction Tuning |    |     |
|---------------------|-----------------------|--------------------|---------|-----|-----|--------------------|----|-----|
|                     | Adapter               | Instruction Tuning | LR      | WD  | BS  | LR                 | WD | BS  |
| Llama-3 8B Instruct | Cambrian Adapter Data | Cambrian-7M        | 1.00e-5 | 0.0 | 512 | 4.00e-5            | 0  | 512 |

Table 4. **Hyperparameters for all VQA experiments.** We exclude LAION [77] from Cambrian data.

| Model  | Width | Depth | Heads | MLP   |
|--------|-------|-------|-------|-------|
| ViT-1B | 1536  | 40    | 24    | 6144  |
| ViT-2B | 2688  | 24    | 21    | 10752 |
| ViT-3B | 3072  | 26    | 24    | 12288 |
| ViT-5B | 3584  | 32    | 28    | 14336 |
| ViT-7B | 4096  | 32    | 32    | 16384 |

Table 5. **Model architecture details.** For consistency, we denote ViT-g from Oquab et al. [73] as ViT-1B.

### B.3. Scaled CLIP Models

We show VQA evaluation results from scaling up MetaCLIP [104] trained on MC-2B, in Tab. 12. These are the full results for Sec. 3.1. In contrast to visual SSL methods in Tab. 7 and Tab. 11, CLIP models do not exhibit clear scaling behavior.

### B.4. Text Filtered Models

We provide full results for Question 4. As shown in Tab. 13, SSL models learn features particularly well-suited for OCR & Chart tasks when trained on datasets with a higher concentration of text-rich images. This suggests that visual SSL is sensitive to the underlying training distribution and can be effectively steered toward specific downstream applications, such as OCR & Chart.

### B.5. Baseline Models

In Tab. 14, we provide full VQA results for the reference off-shelf models that we evaluated in Sec. 5.

## C. Additional Results

We include extra results that were not presented in the main text.

### C.1. Classic Vision Performance of Scaling CLIP

In Tab. 15, we provide full classic vision results for CLIP trained on MC-2B with 2 billion images seen, for models ranging from 1B to 7B parameters. In Fig. 10, we visualize the classic vision performance of CLIP compared to Web-DINO trained on the same data, and see that CLIP consistently underperforms Web-DINO on classic vision evals across all model sizes.

### C.2. Scaling CLIP Text Encoder

Throughout the paper, we used the standard 300M parameter text encoder from OpenCLIP (24 layers, 16 heads per

layer, 1024 dimension). To test whether the capacity of the text encoder is a bottleneck for training larger CLIP vision encoders, we scale the text encoder to 600M and 1B parameters. The results in Tab. 16 suggest that increasing the capacity of CLIP’s text encoder does not improve performance.

### C.3. Comparison to Non-CLIP Language-Supervised Models

AIMv2 [31] is also a recent language-supervised vision encoder that leverages a text decoding and masked image modeling objective, unlike CLIP-family models which are contrastively pretrained. As AIMv2 is trained on different data, the comparison to Web-SSL is not quite apples-to-apples — similar to the other comparisons in Tab. 2 — but offers an additional perspective into Web-SSL’s performance compared to other model families.

In Tab. 17, we compare AIMv2 to Web-SSL and observe that while Web-SSL achieves slightly lower performance on VQA, it is still competitive with AIMv2 despite not receiving any text supervision and using different data. Web-SSL does better on image classification and semantic segmentation, while doing significantly worse on depth estimation.

## D. High Resolution Adaption of Web-SSL

Following Oquab et al. [73], we further fine-tune our model under higher resolution settings of  $378 \times 378$  and  $518 \times 518$  for 20k iterations. We use a batch size of 2048 and a correspondingly lower learning rate of  $1.41e-5$ . All other parameters remain exactly the same as previously specified, including the learning rate warmup ratio, given the total of 10k iterations.

We also provided detailed benchmark results of high-resolution adaptation of Web-DINO in Tab. 18.

## E. Evaluation

Tab. 19 lists evaluation benchmarks used and their purposes.

## F. Pretraining Dataset Cards

For reference, in Tab. 20 we include the data composition of LVD-142M, which was used to train the off-shelf DINOv2 model [73]. LVD-142M is a carefully curated data mix closely aligned with downstream classic vision evaluation tasks. In comparison, we leverage MetaCLIP data, which is less curated and collected from 15 snapshots of CommonCrawl (CC).

| Vision Backbone |         | General          |       |                   |       | Knowledge        |                   |                        |       | OCR & Chart |          |         |        | Vision-Centric |             |                        |                        |
|-----------------|---------|------------------|-------|-------------------|-------|------------------|-------------------|------------------------|-------|-------------|----------|---------|--------|----------------|-------------|------------------------|------------------------|
| Model           | Average | MME <sup>P</sup> | MMB   | SEED <sup>I</sup> | GQA   | SQA <sup>I</sup> | MMMU <sup>V</sup> | MathVista <sup>M</sup> | AI2D  | ChartQA     | OCRBench | TextVQA | DocVQA | MMVP           | RealWorldQA | CV-Bench <sup>2D</sup> | CV-Bench <sup>3D</sup> |
| Web-DINO ViT-1B | 49.01   | 1731.52          | 65.37 | 69.92             | 62.40 | 72.58            | 35.33             | 12.30                  | 64.28 | 19.20       | 9.40     | 47.41   | 17.00  | 37.33          | 57.12       | 64.80                  | 63.16                  |
| Web-DINO ViT-2B | 50.77   | 1760.80          | 68.98 | 71.29             | 62.89 | 73.67            | 31.77             | 15.90                  | 67.06 | 23.30       | 15.60    | 49.20   | 19.00  | 38.00          | 57.38       | 65.85                  | 64.41                  |
| Web-DINO ViT-3B | 51.71   | 1757.27          | 68.04 | 71.84             | 63.19 | 73.57            | 33.00             | 14.40                  | 67.32 | 25.68       | 17.10    | 50.45   | 20.00  | 42.66          | 56.86       | 69.49                  | 65.83                  |
| Web-DINO ViT-5B | 52.83   | 1840.81          | 70.01 | 72.39             | 63.56 | 75.06            | 32.11             | 12.40                  | 67.77 | 26.96       | 22.10    | 50.64   | 21.00  | 44.66          | 57.64       | 67.75                  | 69.16                  |
| Web-DINO ViT-7B | 53.87   | 1823.76          | 68.98 | 73.02             | 64.22 | 74.61            | 35.11             | 14.00                  | 69.43 | 28.80       | 23.59    | 51.10   | 22.00  | 48.00          | 59.34       | 69.96                  | 68.58                  |

Table 6. **VQA Evaluation: Web-DINO trained on MC-2B with 2 billion images seen.**

| Vision Backbone | IN1k lin. | ADE20K lin. | ADE20K +ms. | NYUd lin. 1 (↓) | NYUd lin. 4 (↓) |
|-----------------|-----------|-------------|-------------|-----------------|-----------------|
| Web-DINO ViT-1B | 84.70     | 46.60       | 50.97       | 0.364           | 0.345           |
| Web-DINO ViT-2B | 85.16     | 50.55       | 52.32       | 0.351           | 0.335           |
| Web-DINO ViT-3B | 85.66     | 50.17       | 53.12       | 0.348           | 0.328           |
| Web-DINO ViT-5B | 85.84     | 49.54       | 53.27       | 0.378           | 0.335           |
| Web-DINO ViT-7B | 86.00     | 49.08       | 54.65       | 0.380           | 0.339           |

Table 7. **Classic Vision Evaluation: Web-DINO trained on MC-2B with 2 billion images seen.**

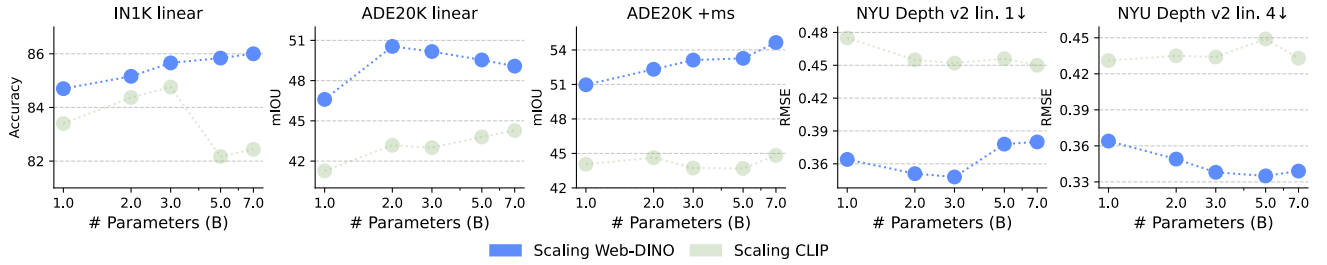

Figure 10. Classic vision evals for CLIP vs. DINO trained on 2 billion images seen from MC-2B. Lower is better for NYU Depth.

## G. Limitations

In this work, we focus on training visual SSL models without using language. The main limitation of vision-only models, compared to language-supervised models, is that they do not support zero-shot image classification out of the box. However, by integrating visual SSL models into MLLM frameworks through instruction tuning, we show they can achieve impressive downstream performance across classification and other tasks. Another way to achieve zero-shot image classification is to use LiT-style adaptation [51, 107], but this is out-of-scope for our work as we do not use language supervision. To focus on comparing the vision encoder, we fixed the base LLM for visual instruction tuning to Llama-3 8B Instruct [2]. We hypothesize that the findings using other LLM backbones would be similar, however this is not in scope for our work. Additionally, while we demonstrate that visual SSL scales well on MetaCLIP data, we leave the exploration of even larger and/or uncuration datasets to future work.

| Vision Backbone           |         | General          |       |                   |       | Knowledge        |                   |                        |       | OCR & Chart |          |         |        | Vision-Centric |             |                        |                        |
|---------------------------|---------|------------------|-------|-------------------|-------|------------------|-------------------|------------------------|-------|-------------|----------|---------|--------|----------------|-------------|------------------------|------------------------|
| Model                     | Average | MME <sup>P</sup> | MMB   | SEED <sup>I</sup> | GQA   | SQA <sup>I</sup> | MMMU <sup>V</sup> | MathVista <sup>M</sup> | AI2D  | ChartQA     | OCRBench | TextVQA | DocVQA | MMVP           | RealWorldQA | CV-Bench <sup>2D</sup> | CV-Bench <sup>3D</sup> |
| Web-DINO ViT-7B (1B Data) | 51.02   | 1785.97          | 68.12 | 72.54             | 63.60 | 73.87            | 32.88             | 12.70                  | 66.58 | 23.60       | 15.20    | 49.04   | 19.00  | 43.33          | 57.12       | 68.35                  | 61.08                  |
| Web-DINO ViT-7B (2B Data) | 53.87   | 1823.76          | 68.98 | 73.02             | 64.22 | 74.61            | 35.11             | 14.00                  | 69.43 | 28.80       | 23.59    | 51.10   | 22.00  | 48.00          | 59.34       | 69.96                  | 68.58                  |
| Web-DINO ViT-7B (4B Data) | 54.37   | 1827.12          | 71.39 | 72.61             | 63.53 | 72.73            | 34.00             | 18.90                  | 67.09 | 35.12       | 30.00    | 53.19   | 24.00  | 45.33          | 55.94       | 69.68                  | 65.00                  |
| Web-DINO ViT-7B (8B Data) | 55.24   | 1811.05          | 71.30 | 72.14             | 64.04 | 72.43            | 35.66             | 15.20                  | 68.52 | 35.52       | 36.40    | 56.53   | 29.00  | 46.00          | 57.90       | 70.53                  | 62.08                  |

Table 8. **VQA Evaluation: Web-DINO ViT-7B trained on MC-2B with increased number of images seen.**

| Vision Backbone           | IN1k lin. | ADE20K lin. | ADE20K +ms. | NYUd lin. 1 (↓) | NYUd lin. 4 (↓) |
|---------------------------|-----------|-------------|-------------|-----------------|-----------------|
| Web-DINO ViT-7B (2B Data) | 86.00     | 49.08       | 54.65       | 0.380           | 0.339           |
| Web-DINO ViT-7B (4B Data) | 86.33     | 47.41       | 54.66       | 0.416           | 0.363           |
| Web-DINO ViT-7B (8B Data) | 86.52     | 42.14       | 52.55       | 0.491           | 0.376           |

Table 9. **Classic Vision Evaluation: Web-DINO ViT-7B trained on MC-2B with increased number of images seen.**

| Vision Backbone |         | General          |       |                   |       | Knowledge        |                   |                        |       | OCR & Chart |          |         |        | Vision-Centric |             |                        |                        |
|-----------------|---------|------------------|-------|-------------------|-------|------------------|-------------------|------------------------|-------|-------------|----------|---------|--------|----------------|-------------|------------------------|------------------------|
| Model           | Average | MME <sup>P</sup> | MMB   | SEED <sup>I</sup> | GQA   | SQA <sup>I</sup> | MMMU <sup>V</sup> | MathVista <sup>M</sup> | AI2D  | ChartQA     | OCRBench | TextVQA | DocVQA | MMVP           | RealWorldQA | CV-Bench <sup>2D</sup> | CV-Bench <sup>3D</sup> |
| Web-DINO ViT-1B | 46.39   | 1704.30          | 59.27 | 66.43             | 60.12 | 71.29            | 32.77             | 18.70                  | 63.40 | 17.56       | 4.90     | 44.93   | 14.00  | 32.00          | 52.41       | 62.81                  | 56.41                  |
| Web-DINO ViT-2B | 45.99   | 1666.01          | 60.13 | 66.64             | 60.19 | 68.71            | 34.88             | 12.10                  | 62.07 | 18.60       | 4.39     | 45.55   | 14.00  | 32.66          | 52.67       | 62.07                  | 57.83                  |
| Web-DINO ViT-3B | 46.43   | 1729.40          | 60.56 | 66.99             | 60.24 | 70.50            | 31.88             | 11.70                  | 62.30 | 17.52       | 4.80     | 45.18   | 15.00  | 31.33          | 53.20       | 62.77                  | 62.50                  |
| Web-DINO ViT-5B | 46.28   | 1661.25          | 59.27 | 67.24             | 61.10 | 69.41            | 31.55             | 10.90                  | 61.46 | 18.72       | 4.60     | 45.53   | 15.00  | 34.00          | 53.07       | 64.57                  | 61.08                  |

Table 10. **VQA Evaluation: Web-DINO trained on ImageNet-1k.**

| Vision Backbone |         | General          |       |                   |       | Knowledge        |                   |                        |       | OCR & Chart |          |         |        | Vision-Centric |             |                        |                        |
|-----------------|---------|------------------|-------|-------------------|-------|------------------|-------------------|------------------------|-------|-------------|----------|---------|--------|----------------|-------------|------------------------|------------------------|
| Model           | Average | MME <sup>P</sup> | MMB   | SEED <sup>I</sup> | GQA   | SQA <sup>I</sup> | MMMU <sup>V</sup> | MathVista <sup>M</sup> | AI2D  | ChartQA     | OCRBench | TextVQA | DocVQA | MMVP           | RealWorldQA | CV-Bench <sup>2D</sup> | CV-Bench <sup>3D</sup> |
| Web-MAE ViT-1B  | 49.19   | 1736.22          | 62.02 | 68.38             | 60.05 | 73.27            | 33.11             | 12.90                  | 63.92 | 23.60       | 16.40    | 47.84   | 18.00  | 36.66          | 52.81       | 70.42                  | 60.83                  |
| Web-MAE ViT-2B  | 50.59   | 1700.16          | 63.57 | 69.21             | 60.93 | 72.48            | 32.22             | 15.50                  | 64.44 | 29.00       | 23.20    | 48.78   | 20.00  | 38.00          | 55.16       | 67.98                  | 63.91                  |
| Web-MAE ViT-3B  | 50.92   | 1723.85          | 64.69 | 69.71             | 60.94 | 72.13            | 34.33             | 13.50                  | 65.70 | 30.92       | 24.60    | 48.92   | 20.00  | 37.33          | 54.64       | 64.15                  | 66.91                  |
| Web-MAE ViT-5B  | 51.50   | 1710.13          | 65.12 | 70.13             | 61.10 | 72.63            | 32.66             | 13.90                  | 65.67 | 33.80       | 26.50    | 49.60   | 21.00  | 38.00          | 53.72       | 66.69                  | 67.91                  |

Table 11. **VQA Evaluation: Web-MAE trained on MC-2B.**

| Vision Backbone |         | General          |       |                   |       | Knowledge        |                   |                        |       | OCR & Chart |          |         |        | Vision-Centric |             |                        |                        |
|-----------------|---------|------------------|-------|-------------------|-------|------------------|-------------------|------------------------|-------|-------------|----------|---------|--------|----------------|-------------|------------------------|------------------------|
| Model           | Average | MME <sup>P</sup> | MMB   | SEED <sup>I</sup> | GQA   | SQA <sup>I</sup> | MMMU <sup>V</sup> | MathVista <sup>M</sup> | AI2D  | ChartQA     | OCRBench | TextVQA | DocVQA | MMVP           | RealWorldQA | CV-Bench <sup>2D</sup> | CV-Bench <sup>3D</sup> |
| MetaCLIP ViT-1B | 52.30   | 1813.70          | 68.90 | 69.45             | 60.35 | 74.07            | 33.55             | 12.70                  | 64.41 | 33.20       | 34.59    | 52.15   | 26.00  | 37.33          | 52.15       | 65.47                  | 61.83                  |
| MetaCLIP ViT-2B | 53.03   | 1787.39          | 68.81 | 69.54             | 61.08 | 75.16            | 34.66             | 20.10                  | 65.38 | 32.80       | 32.90    | 52.55   | 26.00  | 37.33          | 52.94       | 65.19                  | 64.67                  |
| MetaCLIP ViT-3B | 53.22   | 1873.67          | 68.72 | 70.33             | 61.85 | 77.29            | 32.77             | 11.80                  | 66.35 | 32.16       | 34.40    | 54.58   | 26.00  | 35.33          | 55.55       | 65.57                  | 65.08                  |
| MetaCLIP ViT-5B | 52.52   | 1779.03          | 70.10 | 70.26             | 61.53 | 72.43            | 33.44             | 17.90                  | 66.74 | 30.04       | 32.20    | 52.49   | 25.00  | 39.33          | 54.50       | 64.22                  | 61.16                  |
| MetaCLIP ViT-7B | 52.97   | 1827.80          | 69.93 | 69.47             | 61.33 | 74.91            | 35.55             | 16.80                  | 65.15 | 32.12       | 32.10    | 52.07   | 25.00  | 39.33          | 54.11       | 65.08                  | 63.16                  |

Table 12. **VQA Evaluation: MetaCLIP trained on MC-2B with 2 billion images seen.**

| Vision Backbone                |         | General          |       |                   |       |                  | Knowledge         |                        |       |         | OCR & Chart |         |        |       | Vision-Centric |                        |                        |  |
|--------------------------------|---------|------------------|-------|-------------------|-------|------------------|-------------------|------------------------|-------|---------|-------------|---------|--------|-------|----------------|------------------------|------------------------|--|
| Model                          | Average | MME <sup>P</sup> | MMB   | SEED <sup>I</sup> | GQA   | SQA <sup>I</sup> | MMMU <sup>V</sup> | MathVista <sup>M</sup> | AI2D  | ChartQA | OCRBench    | TextVQA | DocVQA | MMVP  | RealWorldQA    | CV-Bench <sup>2D</sup> | CV-Bench <sup>3D</sup> |  |
| Web-DINO ViT-1B (No Filter)    | 49.01   | 1731.52          | 65.37 | 69.92             | 62.40 | 72.58            | 35.33             | 12.30                  | 64.28 | 19.20   | 9.40        | 47.41   | 17.00  | 37.33 | 57.12          | 64.80                  | 63.16                  |  |
| Web-DINO ViT-1B (Light Filter) | 50.73   | 1690.89          | 65.54 | 70.68             | 62.63 | 70.99            | 33.89             | 17.80                  | 63.69 | 26.12   | 21.80       | 50.56   | 20.00  | 36.00 | 56.86          | 64.84                  | 65.75                  |  |
| Web-DINO ViT-1B (Heavy Filter) | 49.44   | 1593.79          | 61.40 | 65.34             | 59.53 | 71.19            | 31.33             | 14.90                  | 64.83 | 36.92   | 24.09       | 50.09   | 27.00  | 21.33 | 53.20          | 66.53                  | 63.66                  |  |
| Web-DINO ViT-2B (No Filter)    | 50.77   | 1760.80          | 68.98 | 71.29             | 62.89 | 73.67            | 31.77             | 15.90                  | 67.06 | 23.30   | 15.60       | 49.20   | 19.00  | 38.00 | 57.38          | 65.85                  | 64.41                  |  |
| Web-DINO ViT-2B (Light Filter) | 53.38   | 1768.67          | 68.38 | 71.80             | 63.24 | 74.16            | 33.88             | 31.40                  | 67.38 | 31.40   | 27.30       | 51.26   | 23.00  | 39.33 | 56.47          | 61.13                  | 65.50                  |  |
| Web-DINO ViT-2B (Heavy Filter) | 53.65   | 1743.56          | 65.29 | 69.28             | 61.19 | 74.86            | 32.22             | 14.50                  | 67.42 | 47.48   | 29.40       | 52.80   | 32.00  | 40.00 | 54.50          | 65.85                  | 64.50                  |  |

Table 13. **VQA Evaluation: Web-DINO trained on text filtered MC-2B.**

| Vision Backbone                     |         | General          |       |                   |       | Knowledge        |                               |                         |       | OCR & Chart |          |         |        | Vision-Centric |             |                        |                        |
|-------------------------------------|---------|------------------|-------|-------------------|-------|------------------|-------------------------------|-------------------------|-------|-------------|----------|---------|--------|----------------|-------------|------------------------|------------------------|
| Model                               | Average | MME <sup>P</sup> | MMB   | SEED <sup>I</sup> | GQA   | SQA <sup>I</sup> | MMM <sup>U</sup> <sup>V</sup> | Math Vista <sup>M</sup> | AI2D  | ChartQA     | OCRBench | TextVQA | DocVQA | MMVP           | RealWorldQA | CV-Bench <sup>2D</sup> | CV-Bench <sup>3D</sup> |
| CLIP Models                         |         |                  |       |                   |       |                  |                               |                         |       |             |          |         |        |                |             |                        |                        |
| MetaCLIP ViT-H <sub>224px</sub>     | 54.91   | 1860.58          | 72.93 | 70.96             | 62.22 | 77.88            | 36.88                         | 15.00                   | 67.32 | 35.60       | 33.40    | 55.10   | 29.00  | 41.33          | 53.46       | 68.53                  | 65.91                  |
| SigLIP ViT-SO400M <sub>224px</sub>  | 55.36   | 1807.30          | 72.76 | 71.83             | 62.68 | 76.74            | 35.44                         | 14.00                   | 68.65 | 33.08       | 40.20    | 56.61   | 28.00  | 47.33          | 56.99       | 66.42                  | 64.66                  |
| SigLIP ViT-SO400M <sub>384px</sub>  | 59.97   | 1892.16          | 73.71 | 73.00             | 63.80 | 77.83            | 33.88                         | 20.00                   | 69.78 | 54.24       | 46.40    | 63.53   | 50.00  | 46.00          | 58.43       | 67.37                  | 66.91                  |
| SigLIP2 ViT-SO400M <sub>224px</sub> | 56.32   | 1789.26          | 73.36 | 72.20             | 62.60 | 74.96            | 35.55                         | 22.40                   | 69.85 | 35.76       | 42.00    | 59.68   | 31.00  | 44.00          | 54.24       | 69.88                  | 64.16                  |
| SigLIP2 ViT-SO400M <sub>384px</sub> | 61.98   | 1895.70          | 74.57 | 72.24             | 64.81 | 79.27            | 36.33                         | 19.90                   | 72.24 | 59.68       | 52.90    | 67.15   | 54.00  | 49.33          | 54.77       | 70.73                  | 69.00                  |
| SSL Models                          |         |                  |       |                   |       |                  |                               |                         |       |             |          |         |        |                |             |                        |                        |
| DINOv2 ViT-g <sub>224px</sub>       | 49.25   | 1785.25          | 64.86 | 70.89             | 62.89 | 72.03            | 32.11                         | 12.40                   | 62.37 | 17.96       | 5.50     | 47.06   | 15.00  | 47.33          | 56.33       | 65.92                  | 66.08                  |
| DINOv2 ViT-g <sub>378px</sub>       | 47.94   | 1734.38          | 64.26 | 71.50             | 62.21 | 71.04            | 33.11                         | 9.60                    | 63.08 | 17.76       | 5.00     | 45.59   | 15.00  | 41.33          | 56.47       | 63.79                  | 60.58                  |
| DINOv2 ViT-g <sub>518px</sub>       | 47.91   | 1694.08          | 62.45 | 70.64             | 62.87 | 71.29            | 33.55                         | 11.80                   | 63.37 | 18.32       | 5.10     | 46.27   | 15.00  | 37.33          | 56.60       | 65.36                  | 61.83                  |
| I-JEPA ViT-H <sub>224px</sub>       | 44.78   | 1598.15          | 60.01 | 64.04             | 57.66 | 68.91            | 34.55                         | 10.20                   | 62.07 | 16.72       | 4.00     | 42.99   | 14.00  | 29.33          | 49.93       | 57.39                  | 57.16                  |
| MAE ViT-H <sub>224px</sub>          | 45.21   | 1697.06          | 56.87 | 56.41             | 60.51 | 70.74            | 32.11                         | 11.50                   | 61.30 | 17.40       | 5.50     | 45.38   | 14.00  | 27.33          | 53.46       | 61.19                  | 64.75                  |

Table 14. **VQA Evaluation: Off-shelf CLIP and SSL models.**

| Vision Backbone | IN1k lin. | ADE20K lin. | ADE20K +ms. | NYUd lin. 1 (↓) | NYUd lin. 4 (↓) |
|-----------------|-----------|-------------|-------------|-----------------|-----------------|
| CLIP ViT-1B     | 83.40     | 41.27       | 44.06       | 0.475           | 0.431           |
| CLIP ViT-2B     | 84.37     | 43.18       | 44.63       | 0.455           | 0.435           |
| CLIP ViT-3B     | 84.76     | 43.00       | 43.73       | 0.452           | 0.434           |
| CLIP ViT-5B     | 82.17     | 43.80       | 43.69       | 0.456           | 0.449           |
| CLIP ViT-7B     | 82.44     | 44.83       | 44.28       | 0.450           | 0.433           |

Table 15. **Classic Vision Evaluation: CLIP trained on MC-2B with 2 billion images seen.**

| Vision Enc. | Text Enc. | Params | Avg  | General | Knowledge | OCR/Chart | Vision |
|-------------|-----------|--------|------|---------|-----------|-----------|--------|
| ViT-2B      |           | 300M   | 53.0 | 72.2    | 48.8      | 36.1      | 55.0   |
| ViT-2B      |           | 600M   | 52.6 | 73.3    | 49.0      | 36.5      | 51.7   |
| ViT-2B      |           | 1B     | 52.5 | 73.7    | 46.9      | 34.7      | 54.5   |

Table 16. **Scaling the CLIP text encoder:** VQA results for scaling the CLIP text encoder with ViT-2B.

| Model                         |                       |                       |     | MLLM Evaluator |         |           |             |                | Classic Vision Tasks |             |            |                 |                 |
|-------------------------------|-----------------------|-----------------------|-----|----------------|---------|-----------|-------------|----------------|----------------------|-------------|------------|-----------------|-----------------|
| Method                        | Pretrain Data         | Pretrain Samples Seen | Res | AVG            | General | Knowledge | OCR & Chart | Vision-Centric | IN1k lin.            | ADE20K lin. | ADE20K ms. | NYUd lin. 1 (↓) | NYUd lin. 4 (↓) |
| Language-Supervised Models    |                       |                       |     |                |         |           |             |                |                      |             |            |                 |                 |
| AIMv2 3B                      | DFN-2B + COYO + HQITP | 12.0B                 | 336 | 59.7           | 75.3    | 50.1      | 53.1        | 60.1           | 86.5                 | 37.1        | 45.9       | 0.340           | 0.322           |
|                               |                       |                       | 448 | 63.8           | 77.0    | 51.1      | 62.5        | 64.5           | 83.2                 | 37.0        | 46.9       | 0.153           | 0.125           |
| Visual Self-Supervised Models |                       |                       |     |                |         |           |             |                |                      |             |            |                 |                 |
| Web-DINO ViT-7B               | MC-2B                 | 8.0B                  | 224 | 55.2           | 74.5    | 48.0      | 39.4        | 59.1           | 86.5                 | 42.1        | 52.6       | 0.491           | 0.376           |
|                               |                       |                       | 378 | 57.4           | 73.9    | 47.7      | 50.4        | 57.7           | 86.3                 | 42.3        | 53.1       | 0.498           | 0.366           |
|                               |                       |                       | 518 | 59.9           | 75.5    | 48.2      | 55.1        | 60.8           | 86.4                 | 42.6        | 52.8       | 0.490           | 0.362           |

Table 17. **Comparison with AIMv2.** Web-DINO ViT-7B achieves competitive performance with AIMv2 on VQA without language supervision. On classic vision, DINO performs better at image classification and segmentation, while AIMv2 performs significantly better at depth estimation.

| Vision Backbone           |         | General          |       |                   |       | Knowledge        |                   |                         |       | OCR & Chart |          |         |        | Vision-Centric |             |                        |                        |
|---------------------------|---------|------------------|-------|-------------------|-------|------------------|-------------------|-------------------------|-------|-------------|----------|---------|--------|----------------|-------------|------------------------|------------------------|
| Model                     | Average | MME <sup>P</sup> | MMB   | SEED <sup>I</sup> | GQA   | SQA <sup>I</sup> | MMMU <sup>V</sup> | Math Vista <sup>M</sup> | AI2D  | ChartQA     | OCRBench | TextVQA | DocVQA | MMVP           | RealWorldQA | CV-Bench <sup>2D</sup> | CV-Bench <sup>3D</sup> |
| Web-DINO <sub>224px</sub> | 55.24   | 1811.05          | 71.30 | 72.14             | 64.04 | 72.43            | 35.66             | 15.20                   | 68.52 | 35.52       | 36.40    | 56.53   | 29.00  | 46.00          | 57.90       | 70.53                  | 62.08                  |
| Web-DINO <sub>378px</sub> | 57.43   | 1757.06          | 70.61 | 72.59             | 64.50 | 72.53            | 35.11             | 16.10                   | 67.09 | 52.04       | 42.19    | 61.51   | 46.00  | 38.00          | 59.08       | 66.55                  | 67.16                  |
| Web-DINO <sub>518px</sub> | 59.91   | 1807.08          | 73.79 | 72.92             | 64.78 | 74.36            | 34.66             | 14.50                   | 69.43 | 57.28       | 45.70    | 64.48   | 53.00  | 43.33          | 60.52       | 70.08                  | 69.41                  |

Table 18. **VQA Evaluation: Web-DINO ViT-7B adapted to different resolution**

| Benchmark    | Eval                 | Citation                |
|--------------|----------------------|-------------------------|
| GQA          | General VQA          | Hudson and Manning [49] |
| SEED         | General VQA          | Ge et al. [35]          |
| MME          | General VQA          | Fu et al. [32]          |
| MMBench      | General VQA          | Liu et al. [61]         |
| AI2D         | Knowledge VQA        | Hiippala et al. [47]    |
| ScienceQA    | Knowledge VQA        | Lu et al. [64]          |
| MathVista    | Knowledge VQA        | Lu et al. [65]          |
| MMMU         | Knowledge VQA        | Yue et al. [105]        |
| TextVQA      | OCR & Chart VQA      | Singh et al. [80]       |
| DocVQA       | OCR & Chart VQA      | Mathew et al. [68]      |
| ChartQA      | OCR & Chart VQA      | Masry et al. [67]       |
| OCRBench     | OCR & Chart VQA      | Liu et al. [60]         |
| MMVP         | Vision-Centric VQA   | Tong et al. [93]        |
| RealWorldQA  | Vision-Centric VQA   | xAI [101]               |
| CVBench-2D   | Vision-Centric VQA   | Tong et al. [91]        |
| CVBench-3D   | Vision-Centric VQA   | Tong et al. [91]        |
| ImageNet-1k  | Image Classification | Deng et al. [24]        |
| ADE-20k      | Image Segmentation   | Zhou et al. [111]       |
| NYU Depth v2 | Depth Estimation     | Silberman et al. [79]   |

Table 19. **List of benchmarks used**

| Task                  | Dataset / Split                     | Images     | Retrieval | Retrieved  | Final       |
|-----------------------|-------------------------------------|------------|-----------|------------|-------------|
| classification        | ImageNet-22k / –                    | 14,197,086 | as is     | –          | 14,197,086  |
| classification        | ImageNet-22k / –                    | 14,197,086 | sample    | 56,788,344 | 56,788,344  |
| classification        | ImageNet-1k / train                 | 1,281,167  | sample    | 40,997,344 | 40,997,344  |
| fine-grained classif. | Caltech 101 / train                 | 3,030      | cluster   | 2,630,000  | 1,000,000   |
| fine-grained classif. | CUB-200-2011 / train                | 5,994      | cluster   | 1,300,000  | 1,000,000   |
| fine-grained classif. | DTD / train1                        | 1,880      | cluster   | 1,580,000  | 1,000,000   |
| fine-grained classif. | FGVC-Aircraft / train               | 3,334      | cluster   | 1,170,000  | 1,000,000   |
| fine-grained classif. | Flowers-102 / train                 | 1,020      | cluster   | 1,060,000  | 1,000,000   |
| fine-grained classif. | Food-101 / train                    | 75,750     | cluster   | 21,670,000 | 1,000,000   |
| fine-grained classif. | Oxford-IIIT Pet / trainval          | 3,680      | cluster   | 2,750,000  | 1,000,000   |
| fine-grained classif. | Stanford Cars / train               | 8,144      | cluster   | 7,220,000  | 1,000,000   |
| fine-grained classif. | SUN397 / train1                     | 19,850     | cluster   | 18,950,000 | 1,000,000   |
| fine-grained classif. | Pascal VOC 2007 / train             | 2,501      | cluster   | 1,010,000  | 1,000,000   |
| segmentation          | ADE20K / train                      | 20,210     | cluster   | 20,720,000 | 1,000,000   |
| segmentation          | Cityscapes / train                  | 2,975      | cluster   | 1,390,000  | 1,000,000   |
| segmentation          | Pascal VOC 2012 (seg.) / trainaug   | 1,464      | cluster   | 10,140,000 | 1,000,000   |
| depth estimation      | Mapillary SLS / train               | 1,434,262  | as is     | –          | 1,434,262   |
| depth estimation      | KITTI / train (Eigen)               | 23,158     | cluster   | 3,700,000  | 1,000,000   |
| depth estimation      | NYU Depth V2 / train                | 24,231     | cluster   | 10,850,000 | 1,000,000   |
| depth estimation      | SUN RGB-D / train                   | 4,829      | cluster   | 4,870,000  | 1,000,000   |
| retrieval             | Google Landmarks v2 / train (clean) | 1,580,470  | as is     | –          | 1,580,470   |
| retrieval             | Google Landmarks v2 / train (clean) | 1,580,470  | sample    | 6,321,880  | 6,321,880   |
| retrieval             | AmsterTime / new                    | 1,231      | cluster   | 960,000    | 960,000     |
| retrieval             | AmsterTime / old                    | 1,231      | cluster   | 830,000    | 830,000     |
| retrieval             | Met / train                         | 397,121    | cluster   | 62,860,000 | 1,000,000   |
| retrieval             | Revisiting Oxford / base            | 4,993      | cluster   | 3,680,000  | 1,000,000   |
| retrieval             | Revisiting Paris / base             | 6,322      | cluster   | 3,660,000  | 1,000,000   |
|                       |                                     |            |           |            | 142,109,386 |

Table 20. **LVD-142M Data Sources.** In contrast to LVD-142M, which relies on highly curated data sources drawn from distributions closely aligned with various downstream evaluation tasks (see the table above from Oquab et al. [73]), our data curation approach adopts the methodology from MetaCLIP [104], utilizing web data collected from 15 snapshots of CommonCrawl (CC) spanning January 2021 through January 2023.
